# Supplementary material for: Quantitative Real-Time Analysis of Differentially Expressed Genes in Peripheral Blood Samples of Hypertension Patients
Source: MDPI journal article supplement (doi:10.3390/genes13020187), 2022-01-21
Supplement: s1 [file s1]

# Quantitative Real-Time Analysis of Differential Expressed Genes in Peripheral Blood Samples of Hypertension Patients

## Supplementary

**Table S1.** Preliminary investigation of common differentially expressed genes

| Probe ID    | Gene Symbol | Uniport ID    | Log FC | AveEx pr | t      | P-Value  | Adj.P. Val | B      |
|-------------|-------------|---------------|--------|----------|--------|----------|------------|--------|
| 203973_s_at | CEBPD       | CEBPD_HUMAN   | 0.9086 | 7.9950   | 7.5654 | 9.56E-08 | 0.00030    | 7.3341 |
|             |             |               | 28     | 93       | 5      |          | 4          | 75     |
| 222802_at   | EDN1        | EDN1_HUMAN    | 1.1816 | 8.7435   | 3.4168 | 0.0154   |            | 4.1614 |
|             |             |               | 89     | 19       | 12     | 88       | 1          | 3      |
| 203574_at   | NFIL3       | NFIL3_HUMAN   | 0.8817 | 6.8027   | 16.793 | 1.36E-14 | 3.04E-10   | 18.300 |
|             |             |               | 74     | 16       | 69     |          |            | 69     |
| 221009_s_at | ANGPTL4     | ANGPTL4_HUMAN | 2.1808 | 10.325   | 12.182 | 1.21E-11 | 9.01E-08   | 14.142 |
|             |             |               | 81     | 53       | 45     |          |            | 63     |
| 202912_at   | ADM         | ADML_HUMAN    | 1.9871 | 10.647   | 7.9481 | 4.10E-08 | 0.00015    | 8.0280 |
|             |             |               | 31     | 74       | 47     |          | 2          | 82     |
| 208423_s_at | MSR1        | MSRE_HUMAN    | 0.8050 | 6.4785   | 5.0672 | 8.79E-06 | 0.25716    | 1.2395 |
|             |             |               | 7      | 33       | 3      |          |            | 17     |
| 202745_at   | USP8        | H0YM17_HUMAN  | 1.5203 | 8.9306   | 14.120 | 4.21E-14 | 4.86E-10   | 22.109 |
|             |             |               | 93     | 3        | 79     |          |            | 21     |
